# Supplementary material
Source: publisher figshare collection journal article supplement (https://acs.figshare.com/ndownloader/files/4210423)
Supplement: Supplementary file 1 [file 4210423]

## Supporting Information of

### **X-Ray Structures of $\text{Sc}_2\text{C}_2@C_{2n}$ ( $n = 40, 41, 42$ ): In-Depth Understanding of the Core-Shell Interplay in Carbide Cluster Metallofullerenes**

Hiroki Kurihara,<sup>†</sup> Xing Lu,<sup>†</sup> Yuko Iiduka,<sup>†</sup> Hidefumi Nikawa,<sup>†</sup> Makoto Hachiya,<sup>†</sup> Naomi Mizorogi,<sup>†</sup> Zdenek Slanina,<sup>†</sup> Takahiro Tsuchiya,<sup>†</sup> Shigeru Nagase<sup>\*,§</sup>, and Takeshi Akasaka<sup>\*,†</sup>

<sup>†</sup>Life Science Center for Tsukuba Advanced Research Alliance, University of Tsukuba, Tsukuba, Ibaraki  
305-8577, Japan

<sup>§</sup>Department of Theoretical and Computational Molecular Science, Institute for Molecular Science, Okazaki,  
Aichi 444-8585, Japan

## **Table of Contents**

### **Experimental section.**

**Figure S1.** Vis-NIR spectra of  $\text{Sc}_2\text{C}_2@C_{2n}$  ( $n = 40, 41, 42$ ) under study.

**Figure S2.** X-ray structures of  $\text{Sc}_2\text{C}_2@C_{80}$  showing.

**Figure S3.** X-ray structures of  $\text{Sc}_2\text{C}_2@C_{82}$  showing cluster disorder.

**Figure S4.** X-ray structures of  $\text{Sc}_2\text{C}_2@C_{84}$  showing cluster disorder.

## Experimental section.

### Preparation of $\text{Sc}_2\text{C}_2@\text{C}_{2n}$

The soot containing scandium metallofullerenes was prepared according to the reported procedure.<sup>13</sup> The Sc/C composite rod ( $4.7 \times 10 \times 150$  mm, 2.0 atom%) was arc-vaporized at 150 A and 40 V under helium at 50 Torr. The raw soot was collected and extracted with  $\text{CS}_2$ . The samples under study were separated and isolated from various empty fullerenes and other scandium metallofullerenes by a multi-stage HPLC method. The purity of all samples is estimated to be higher than 99% with both HPLC analysis and LD-TOF mass spectrometry. The visible-NIR spectra of the isolated  $\text{Sc}_2\text{C}_2@\text{C}_{2n}$  are shown in Fig. S1.

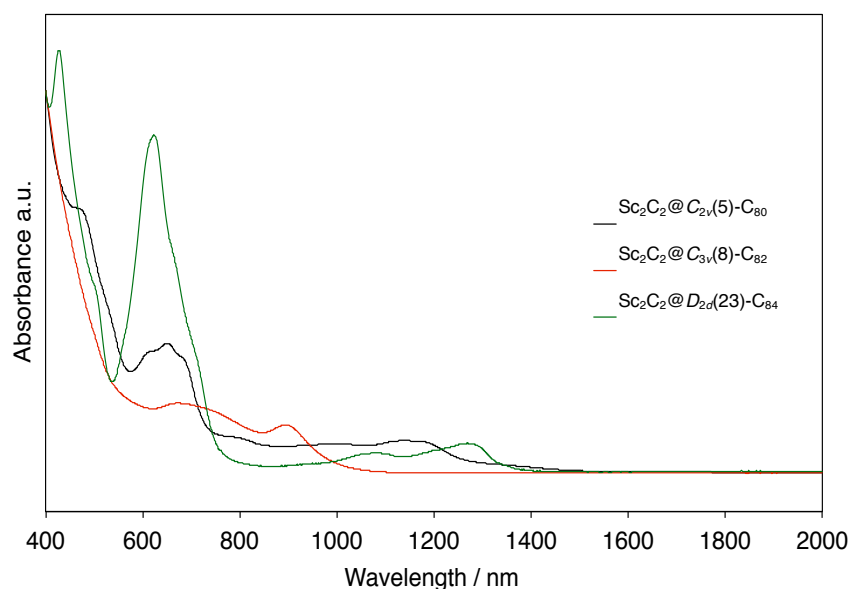

**Figure S1.** Vis-NIR spectra of  $\text{Sc}_2\text{C}_2@\text{C}_{2n}$  ( $n = 40, 41, 42$ ) under study.

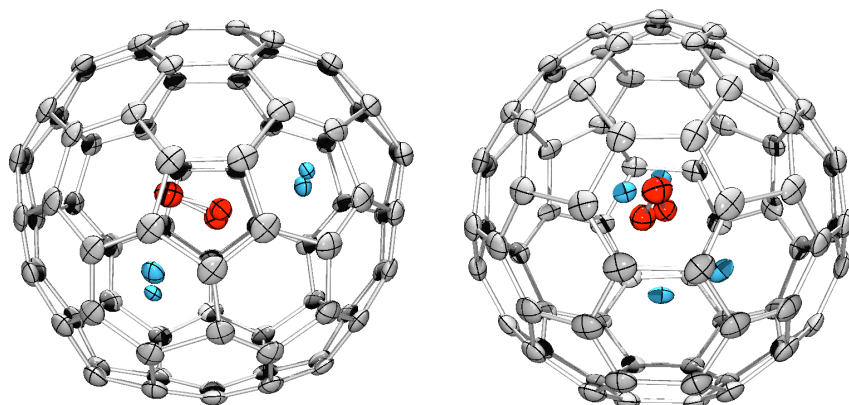

**Figure S2.** X-ray structures of  $\text{Sc}_2\text{C}_2@C_{80}$  showing.

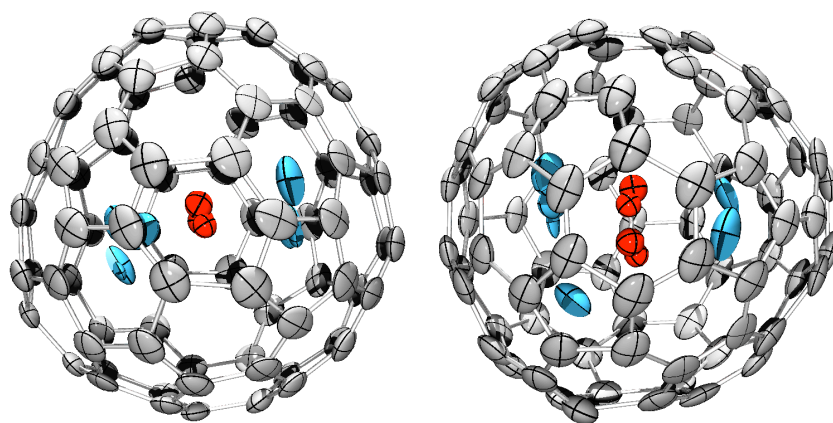

**Figure S3.** X-ray structures of  $\text{Sc}_2\text{C}_2@C_{82}$  showing cluster disorder.

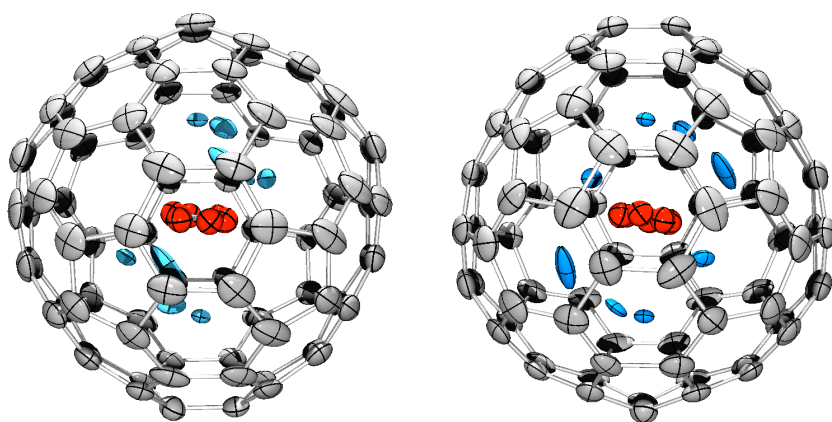

**Figure S4.** X-ray structures of  $\text{Sc}_2\text{C}_2@C_{84}$  showing cluster disorder.
